# Supplementary material for: Spatially bivariate EEG-neurofeedback can manipulate interhemispheric inhibition
Source: eLife. 2022 Jul 7;11:e76411. doi: 10.7554/eLife.76411 (PMC9302968; doi:10.7554/eLife.76411)
Supplement: Supplementary file 1. [file elife-76411-supp1.xlsx]

## Sheet: Sheet1
	Table 1
	Target-hemisphere-specific modulation at the EEG level induced by spatially bivariate BCI-based neurofeedback (Figures 2A and B)
		REST	NoFB	HIGH	MID	LOW	F-value	p-value	η2-value
	contralateral SMR-ERD, %	–10.6 ± 11.6	13.5 ± 29.5*	19.3 ± 26.5**	16.1 ± 24.1**	13.3 ± 28.4*	4.81	0.014	0.16 (large)
	ipsilateral SMR-ERD, %	–18.8 ± 12.2	–10.5 ± 34.0	64.5 ± 14.0***,†††	10.1 ± 20.3*,‡ ‡ ‡	–156.3 ± 49.0***,†††,‡‡‡,§§§	156	< 0.001	0.86 (large)
	Values are mean value ± SD. Post-hoc two-tailed paired t-test showed significant difference with REST value *, NoFB value †, HIGH value ‡, and MID value §. F values and P values were calculated by repeated-measures ANOVA. The number of each dendrogram is as follows: for example, * p < 0.05, ** p < 0.01, and *** p < 0.001; all comparisons were Bonferroni corrected.
	Table 2
	Target-hemisphere-specific modulation at the EEG level induced by spatially bivariate BCI-based neurofeedback in other frequency bands (Figure 2—figure supplements 1A and B )
		REST	NoFB	HIGH	MID	LOW	F-value	p-value	η2-value
	Power attenuation, %
	contralateral hemisphere
	theta	–15.4 ± 21.7	–19.6 ± 37.7	6.5 ± 32.9	–21.3 ± 40.6	–17.8 ± 33.1	2.21	0.073	0.08 (medium)
	low-beta	–44.9 ± 49.9	–45.9 ± 57.5	–12.9 ± 35.5	–30.0 ± 42.3	–17.4 ± 40.0	2.22	0.072	0.08 (medium)
	high-beta	–50.8 ± 35.3	–59.3 ± 73.4	–41.9 ± 43.5	–52.8 ± 50.6	–69.1 ± 114.7	0.42	0.793	0.02 (small)
	gamma	–60.7 ± 35.0	–68.6 ± 62.8	–52.0 ± 29.1	–74.5 ± 65.3	–85.3 ± 148.6	0.48	0.75	0.02 (small)
	ipsilateral hemisphere
	theta	–31.3 ± 43.1	–19.7 ± 36.7	0.7 ± 35.8	–13.7 ± 30.9	–52.0 ± 78.9***,†	5.05	< 0.001	0.17 (large)
	low-beta	–37.7 ± 37.8	–37.9 ± 34.1	–20.1 ± 38.9	–19.0 ± 30.6	–42.0 ± 26.7	2.12	0.084	0.08 (medium)
	high-beta	–56.8 ± 34.8	–51.3 ± 39.0	–29.2 ± 33.9	–53.1 ± 37.5	–80.5 ± 59.1**	3.77	0.007	0.112 (medium)
	gamma	–67.4 ± 37.5	–61.0 ± 39.2	–48.7 ± 29.1	–53.4 ± 23.9	–68.7 ± 39.9	1.28	0.284	0.05 (small)
	Values are mean value ± SD. Post-hoc two-tailed paired t-test showed significant difference with HIGH value * and MID value †. F values and P values were calculated by repeated-measures ANOVA. The number of each dendrogram is as follows: for example, * p < 0.05, ** p < 0.01, and *** p < 0.001; all comparisons were Bonferroni corrected.
	Table 3
	IHI curves (Figure 3B)
		0% RMT	100% RMT	110% RMT	120% RMT	130% RMT	140% RMT	F-value	p-value	η2-value
	MEP amplitude [mV]	0.93 ± 0.25	0.66 ± 0.29*	0.62 ± 0.31***	0.54 ± 0.26***	0.47 ± 0.24***	0.43 ± 0.22***	8.31	< 0.001	0.28 (large)
	Values are mean value ± SD. Post-hoc two-tailed paired t-test showed significant difference with 0% RMT value * (* p < 0.05, ** p < 0.01, and *** p < 0.001; all comparisons were Bonferroni corrected). F values and P values were calculated by repeated-measures ANOVA.
	Table 4
	Comparison of IHI magnitude (Figures 4B and C)
		REST	NoFB	HIGH	MID	LOW	F-value	p-value	η2-value
	(CS+TS)/TS, %	69.0 ± 22.6	85.9 ± 18.3	62.0 ± 23.5†	85.5 ± 26.2‡	96.9 ± 27.7**,‡‡‡	6.85	< 0.001	0.22 (large)
	MEP amplitude [mV]	0.98 ± 0.45	1.50 ± 1.02	1.94 ± 1.37	1.67 ± 1.15	1.93 ± 1.41	2.44	0.104	0.09 (medium)
	Values are mean value ± SD. Post-hoc two-tailed paired t-test showed significant difference with REST value *, NoFB value †, HIGH value ‡. F values and P values were calculated by repeated-measures ANOVA. The number of each dendrogram is as follows: for example, * p < 0.05, ** p < 0.01, and *** p < 0.001; all comparisons were Bonferroni corrected.
	Table 5
	Comparison of the percent change in IHI magnitude based on values in NoFB session (Figure 4—figure supplements 1)
		REST	HIGH	MID	LOW	F-value	p-value	η2-value
	% change from NoFB session, %	–15.8 ± 29.8	–27.3 ± 26.6	2.7 ± 30.2†	17.9 ± 36.4**,†††	8.32	< 0.001	0.24 (large)
	Values are mean value ± SD. Post-hoc two-tailed paired t-test showed significant difference with REST value *and HIGH value †. F values and P values were calculated by repeated-measures ANOVA. The number of each dendrogram is as follows: for example, * p < 0.05, ** p < 0.01, and *** p < 0.001; all comparisons were Bonferroni corrected.
	Table 6
	Comparison of IHI magnitude in triggered and non-triggered TMS trials (Figure 4—figure supplements 2)
		HIGH		MID		LOW		F-value	p-value	η2-value
		triggered	non-triggered	triggered	non-triggered	triggered	non-triggered
	(CS+TS)/TS, %	62.0 ± 23.5	80.5 ± 37.8	85.5 ± 26.2*	83.2 ± 36.3	96.9 ± 27.7***	90.1 ± 30.6	sessions: 5.08	0.008	0.08 (medium)
								trials: 0.32	0.575	< 0.01
								sessions×trials: 1.82	0.167	0.03 (small)
	Values are mean value ± SD. Post-hoc two-tailed paired t-test showed significant difference with HIGH value *. F values and P values were calculated by repeated-measures ANOVA. The number of each dendrogram is as follows: * p < 0.05, ** p < 0.01, and *** p < 0.001; all comparisons were Bonferroni corrected.
	Table 7
	Relationship between the increase in IHI and left MEP amplitude elicited by CS (Figure 4—figure supplements 3B, C, and D)
		REST	NoFB	HIGH	MID	LOW	F-value	p-value	η2-value
	Left MEP amplitude [mV]	1.18 ± 1.02	1.25 ± 0.61	1.46 ± 0.96	1.27 ± 0.88	1.16 ± 0.68	0.39	0.813	0.02 (small)
		HIGH	MID	LOW	F-value	p-value	η2-value
	% change from NoFB session, %
	triggered	27.3 ± 26.6	–2.7 ± 30.2***	–17.9 ± 36.4***	12.75	< 0.001	0.44 (large)
	non-triggered	–1.98 ± 56.6	–1.10 ± 39.1	–7.9 ± 38.2	1.13	0.319	0.10 (medium)
	Values are mean value ± SD. Post-hoc two-tailed paired t-test in the increase in IHI showed significant difference with HIGH value *. F values and P values were calculated by repeated-measures ANOVA. The number of each dendrogram is as follows: * p < 0.05, ** p < 0.01, and *** p < 0.001; all comparisons were Bonferroni corrected.
	Table 8
	Comparison of IHI magnitude for control muscle (Figures 4—figure supplements 4A and B)
		REST	NoFB	HIGH	MID	LOW	F-value	p-value	η2-value
	(CS+TS)/TS, %	74.1 ± 21.5	94.9 ± 15.7*	84.0 ± 22.6	86.0 ± 19.4	82.9 ± 22.8	2.51	0.048	0.12 (medium)
	MEP amplitude [mV]	0.54 ± 0.51	0.50 ± 0.39	0.73 ± 0.61	0.59 ± 0.50	0.65 ± 0.51	0.62	0.649	0.03 (small)
	Values are mean value ± SD. Post-hoc two-tailed paired t-test showed significant difference with REST value *. F values and P values were calculated by repeated-measures ANOVA. The number of each dendrogram is as follows: * p < 0.05, ** p < 0.01, and *** p < 0.001; all comparisons were Bonferroni corrected.
	Table 9
	Associations of IHI magnitude and bilateral EEG patterns (Figures 5D)
		REST	NoFB	HIGH	MID	LOW	F-value	p-value	η2-value
	Network-intensityMI	0.16 ± 0.14	0.27 ± 0.28	0.34 ± 0.31	0.15 ± 0.10*	0.23 ± 0.25	3.04	0.02	0.10 (medium)
	Values are mean value ± SD. Post-hoc two-tailed paired t-test showed significant difference with HIGH value *. F values and P values were calculated by repeated-measures ANOVA. The number of each dendrogram is as follows: * p < 0.05, ** p < 0.01, and *** p < 0.001; all comparisons were Bonferroni corrected.
	Table 10
	Associations of IHI magnitude and bilateral EEG patterns in other frequency bands (Figure 5—figure supplements 1D )
		REST	NoFB	HIGH	MID	LOW	F-value	p-value	η2-value
	Network-intensityMI
	theta	0.18 ± 0.15	0.21 ± 0.14	0.30 ± 0.27	0.15 ± 0.09†	0.20 ± 0.16	2.43	0.052	0.08 (medium)
	low-beta	0.12 ± 0.06	0.14 ± 0.09*	0.28 ± 0.28**	0.12 ± 0.06††	0.15 ± 0.09†	5.14	< 0.001	0.15 (large)
	high-beta	0.11 ± 0.08	0.11 ± 0.08	0.22 ± 0.25	0.10 ± 0.05†	0.15 ± 0.11	3.01	0.019	0.10 (medium)
	gamma	0.07 ± 0.05	0.07 ± 0.04	0.33 ± 0.15	0.17 ± 0.04	0.26 ± 0.07	1.56	0.191	0.06 (small)
	Values are mean value ± SD. Post-hoc two-tailed paired t-test showed significant difference with REST value *and HIGH value †. F values and P values were calculated by repeated-measures ANOVA. The number of each dendrogram is as follows: * p < 0.05, ** p < 0.01, and *** p < 0.001; all comparisons were Bonferroni corrected.
